# Supplementary material
Source: PubMed Central journal article supplement (PMC4215050)
Supplement: amiajnl-2014-002648-s1.pdf [file amiajnl-2014-002648-s1.pdf]

## APPENDIX

*Table A1: List of Antibiotics Used to Construct Study's Dependent Variable*

| Description                         | Prescription                  |                               |                                       |
|-------------------------------------|-------------------------------|-------------------------------|---------------------------------------|
| Aminoglycosides                     | amikacin                      | kanamycin                     | tobramycin                            |
|                                     | gentamicin                    | streptomycin                  |                                       |
| Aminopenicillins                    | amoxicillin                   | ampicillin                    |                                       |
| Antipseudomonal penicillins         | piperacillin                  | ticarcillin                   |                                       |
| Beta-lactamase inhibitors           | amoxicillin-clavulanate       | piperacillin-tazobactam       | ticarcillin-clavulanate               |
|                                     | ampicillin-sulbactam          |                               |                                       |
| First-generation cephalosporins     | cefadroxil                    | cefazolin                     | cephalexin                            |
| Fourth-generation cephalosporins    | cefepime                      |                               |                                       |
| Ketolides                           | telithromycin                 |                               |                                       |
| Lincomycin derivatives              | clindamycin                   | lincomycin                    |                                       |
| Macrolides                          | azithromycin                  | erythromycin                  | erythromycin                          |
|                                     | clarithromycin                | erythromycin ethylsuccinate   | lactobionate<br>erythromycin stearate |
| Miscellaneous antibiotics           | aztreonam                     | daptomycin                    | metronidazole                         |
|                                     | chloramphenicol               | erythromycin-sulfisoxazole    | vancomycin                            |
|                                     | dalfopristin-quinupristin     | linezolid                     |                                       |
| Natural penicillins                 | penicillin G                  | penicillin G procaine         | penicillin V                          |
|                                     | benzathine-procaine           | penicillin G sodium           | potassium penicillin G                |
|                                     | penicillin G potassium        |                               | benzathine oxacillin                  |
| Penicillinase resistant penicillins | dicloxacillin                 | nafcillin                     |                                       |
| Quinolones                          | ciprofloxacin                 | levofloxacin                  | norfloxacin                           |
|                                     | gatifloxacin                  | lomefloxacin                  | ofloxacin                             |
|                                     | gemifloxacin                  | moxifloxacin                  | sparfloxacin                          |
| Rifamycin derivatives               | rifampin                      |                               |                                       |
| Second generation cephalosporin     | cefaclor                      | cefoxitin                     | cefuroxime                            |
| Sulfonamides                        | cefotetan                     | cefprozil                     | loracarbef                            |
|                                     | sulfadiazine                  | sulfisoxazole                 |                                       |
|                                     | sulfamethoxazole-trimethoprim |                               |                                       |
| Tetracyclines                       | doxycycline                   | minocycline                   | tetracycline                          |
| Third generation cephalosporins     | cefdinir                      | cefotaxime                    | ceftibuten                            |
|                                     | cefditoren                    | cefepodoxime                  | ceftriaxone                           |
|                                     | cefixime                      | ceftazidime                   |                                       |
| Urinary anti-infectives             | fosfomicin                    | nitrofurantoin macrocrystals- |                                       |
|                                     | nitrofurantoin                | monohydrate                   |                                       |
|                                     |                               | trimethoprim                  |                                       |
|                                     | nitrofurantoin macrocrystals  |                               |                                       |

*Source: Taken from HEDIS measure(13)*

Table A2: Subset of Antibiotics Defined as “Broad Spectrum” for analyses

| Description                     |                             | Prescription |              |
|---------------------------------|-----------------------------|--------------|--------------|
| Beta-lactamase inhibitors       | amoxicillin-clavulanate     |              |              |
| Macrolides                      | azithromycin clarithromycin |              |              |
| Quinolones                      | ciprofloxacin               | levofloxacin | norfloxacin  |
|                                 | gatifloxacin                | lomefloxacin | ofloxacin    |
|                                 | gemifloxacin                | moxifloxacin | sparfloxacin |
| Second generation cephalosporin | cefaclor                    | cefoxitin    | cefuroxime   |
| Third generation cephalosporins | cefotetan                   | cefprozil    | loracarbef   |
|                                 | cefdinir                    | cefotaxime   | ceftibuten   |
|                                 | cefditoren                  | cefpodoxime  | ceftriaxone  |
|                                 | cefixime                    | ceftazidime  |              |

Table A3: Exclusion Criteria for Secondary Diagnoses Indicating Antibiotic Prescription

| Diagnosis Description           | ICD-9 Codes | Number Excluded |
|---------------------------------|-------------|-----------------|
| Nonsuppurative otitis media     | 381         | 0               |
|                                 | 381.01      | 3               |
|                                 | 381.1       | 0               |
|                                 | 381.2       | 0               |
|                                 | 381.3       | 0               |
|                                 | 381.4       | 0               |
| Suppurative otitis media        | 382         | 149             |
| Acute sinusitis                 | 461         | 31              |
| Chronic sinusitis               | 473         | 119             |
| Acute pharyngitis               | 462         | 132             |
| Acute tonsillitis               | 463         | 12              |
| Streptococcal sore throat       | 034.0       | 7               |
| Pneumonia                       | 481         | 0               |
|                                 | 482         | 1               |
|                                 | 483         | 0               |
|                                 | 484         | 0               |
|                                 | 485         | 0               |
|                                 | 486         | 15              |
| Bacterial infections            | 041         | 5               |
| Urinary tract infections        | 590         | 0               |
|                                 | 595         | 0               |
|                                 | 597         | 0               |
|                                 | 599.0       | 7               |
| Acne                            | 706.1       | 4               |
| Emphysema among adults          | 492         | 3               |
| Chronic bronchitis among adults | 491         | 3               |

Table A4: Single-year GEE models for receipt of antibiotic prescription for acute bronchitis/URI visits

| Variable                      | 2006        | 2007        | 2008        | 2009        | 2010        |
|-------------------------------|-------------|-------------|-------------|-------------|-------------|
| Provider uses e-warning       | 0.76        | 0.97        | 0.89        | 0.77        | 0.70        |
| Provider uses e-prescribing   | 2.53        | 1.25        | 0.83        | 0.89        | 1.80        |
| Provider uses EMR             | 0.52        | 1.38        | 1.11        | 0.94        | 1.10        |
| Provider specialty:           |             |             |             |             |             |
| Pediatrics                    | (Reference) | (Reference) | (Reference) | (Reference) | (Reference) |
| General/family medicine       | 3.58***     | 1.78        | 3.02***     | 1.58        | 1.72        |
| Other                         | 3.69**      | 1.44        | 1.55        | 1.52        | 2.24*       |
| Provider Office Type:         |             |             |             |             |             |
| Private practice              | (Reference) | (Reference) | (Reference) | (Reference) | (Reference) |
| HMO                           | 1.00        | 0.26        | 0.48        | 0.21        | 0.17*       |
| Other                         | 0.79        | 0.91        | 0.74        | 1.00        | 0.93        |
| Patient Insurance Type:       |             |             |             |             |             |
| Private                       | (Reference) | (Reference) | (Reference) | (Reference) | (Reference) |
| Medicare                      | 1.06        | 0.66        | 1.50        | 0.64        | 0.85        |
| Medicaid                      | 0.74        | 0.84        | 1.18        | 0.66        | 0.82        |
| Self-pay                      | 0.92        | 0.77        | 2.14        | 1.44        | 1.27        |
| Other                         | 0.72        | 0.97        | 0.50        | 1.01        | 0.67        |
| Patient age:                  |             |             |             |             |             |
| 0 – 4                         | 0.91        | 0.70        | 0.59        | 0.64        | .43**       |
| 5 – 17                        | 1.14        | 0.82        | 1.40        | 0.76        | 0.56        |
| 18 – 64                       | (Reference) | (Reference) | (Reference) | (Reference) | (Reference) |
| > 65                          | 0.60        | 1.54        | 0.51        | 1.36        | 0.46        |
| Patient race:                 |             |             |             |             |             |
| Non-Hispanic White            | (Reference) | (Reference) | (Reference) | (Reference) | (Reference) |
| Non-Hispanic Black            | 1.41        | 0.85        | 1.33        | 1.29        | 1.25        |
| Hispanic                      | 0.69        | 0.80        | 0.66        | 0.94        | 0.94        |
| Other                         | 0.85        | 0.60        | 0.76        | 0.21**      | 0.67        |
| Patient chronic condition(s): |             |             |             |             |             |
| Asthma                        | 1.01        | 1.27        | 0.62        | 0.85        | 0.69        |
| COPD                          | 2.81***     | 3.46***     | 4.24***     | 1.89**      | 2.19**      |
| Constant                      | 0.17***     | 0.37**      | 0.34**      | 0.60        | 0.66        |

\* p < .05

\*\* p < .01

\*\*\* p < .001

Table A5: Odds Ratios from GEE model for receipt of antibiotic prescription, with e-warning/yearly interaction term

| Variable                                                                                  |                         | Odds Ratio |
|-------------------------------------------------------------------------------------------|-------------------------|------------|
| Provider uses e-warning                                                                   |                         | 0.56*      |
| <i>Interaction Term: E-warning*Proportion of providers using e-warning in survey year</i> |                         | 2.30       |
| Provider uses e-prescribing                                                               |                         | 1.40*      |
| Provider uses EMR                                                                         |                         | 1.03       |
| Provider specialty:                                                                       | Pediatrics              | Reference  |
|                                                                                           | General/family medicine | 2.03***    |
|                                                                                           | Other                   | 1.93***    |
| Provider Office Type:                                                                     | Private practice        | Reference  |
|                                                                                           | HMO                     | 0.24**     |
|                                                                                           | Other                   | 0.89       |
| Patient Insurance Type:                                                                   | Private                 | Reference  |
|                                                                                           | Medicare                | 0.96       |
|                                                                                           | Medicaid                | 0.79*      |
|                                                                                           | Self-pay                | 1.29       |
|                                                                                           | Other                   | 0.80       |
| Patient age:                                                                              | 0 – 4                   | 0.63***    |
|                                                                                           | 5 – 17                  | 0.85       |
|                                                                                           | 18 – 64                 | Reference  |
|                                                                                           | > 65                    | 0.78       |
| Patient race:                                                                             | Non-Hispanic White      | Reference  |
|                                                                                           | Non-Hispanic Black      | 1.23       |
|                                                                                           | Hispanic                | 0.81       |
|                                                                                           | Other                   | 0.54***    |
| Patient chronic condition(s):                                                             | Asthma                  | 0.87       |
|                                                                                           | COPD                    | 2.71***    |
| Constant                                                                                  |                         | 0.41***    |

\* p < .05

\*\* p < .01

\*\*\* p < .001

Table A6: Odds Ratios from GEE model for receipt of Broad Spectrum Antibiotic Prescription for visits resulting in any antibiotic prescription

| Variable                      |                         | Odds Ratio |
|-------------------------------|-------------------------|------------|
| Provider uses e-warning       |                         | 1.54       |
| Provider uses e-prescribing   |                         | 0.72       |
| Provider uses EMR             |                         | 1.03       |
| Provider specialty:           | Pediatrics              | Reference  |
|                               | General/family medicine | 0.92       |
|                               | Other                   | 1.39       |
| Provider Office Type:         | Private practice        | Reference  |
|                               | HMO                     | 0.50       |
|                               | Other                   | 0.60*      |
| Patient Insurance Type:       | Private                 | Reference  |
|                               | Medicare                | 0.88       |
|                               | Medicaid                | 1.03       |
|                               | Self-pay                | 1.09       |
|                               | Other                   | 1.59       |
| Patient age:                  | 0 – 4                   | 1.42       |
|                               | 5 – 17                  | 0.78       |
|                               | 18 – 64                 | Reference  |
|                               | > 65                    | 2.03**     |
| Patient race:                 | Non-Hispanic White      | Reference  |
|                               | Non-Hispanic Black      | 0.56 *     |
|                               | Hispanic                | 0.43***    |
|                               | Other                   | 0.63       |
| Patient chronic condition(s): | Asthma                  | 0.90       |
|                               | COPD                    | 1.15       |
| NAMCS Survey Year:            | 2006                    | Reference  |
|                               | 2007                    | 1.30       |
|                               | 2008                    | 1.39       |
|                               | 2009                    | 1.28       |
|                               | 2010                    | 1.47       |
| Constant                      |                         | 0.25***    |

\*  $p < .05$

\*\*  $p < .01$

\*\*\*  $p < .001$
